# Supplementary material
Source: publisher figshare collection journal article supplement (https://acs.figshare.com/ndownloader/files/15290138)
Supplement: Supplementary file 1 [file 15290138]

## Supporting Information

### **Laser-Assisted Multiscale Fabrication of Configuration-Editable Supercapacitors with High Energy Density**

*Jian Gao<sup>a</sup>, Changxiang Shao<sup>a</sup>, Shengxian Shao<sup>a</sup>, Congcong Bai<sup>a</sup>, Ur rehman Khalil<sup>a</sup>,  
Yang Zhao<sup>a,\*</sup>, Lan Jiang<sup>b</sup>, Liangti Qu<sup>a,c,\*</sup>*

<sup>a</sup> Key Laboratory of Photoelectronic/Electrophotonic Conversion Materials, School of Chemistry, Beijing Institute of Technology, Beijing 100081, P. R. China

<sup>b</sup> Laser Micro-/Nano-Fabrication Laboratory, School of Mechanical Engineering, Beijing Institute of Technology, Beijing 100081, P. R. China

<sup>c</sup> Key Laboratory for Advanced Materials Processing Technology, Ministry of Education of China, State Key Laboratory of Tribology, Department of Mechanical Engineering, Tsinghua University, Beijing 100084, P. R. China.

\* Corresponding authors. E-mail: [yzhao@bit.edu.cn](mailto:yzhao@bit.edu.cn), [lqu@bit.edu.cn](mailto:lqu@bit.edu.cn)

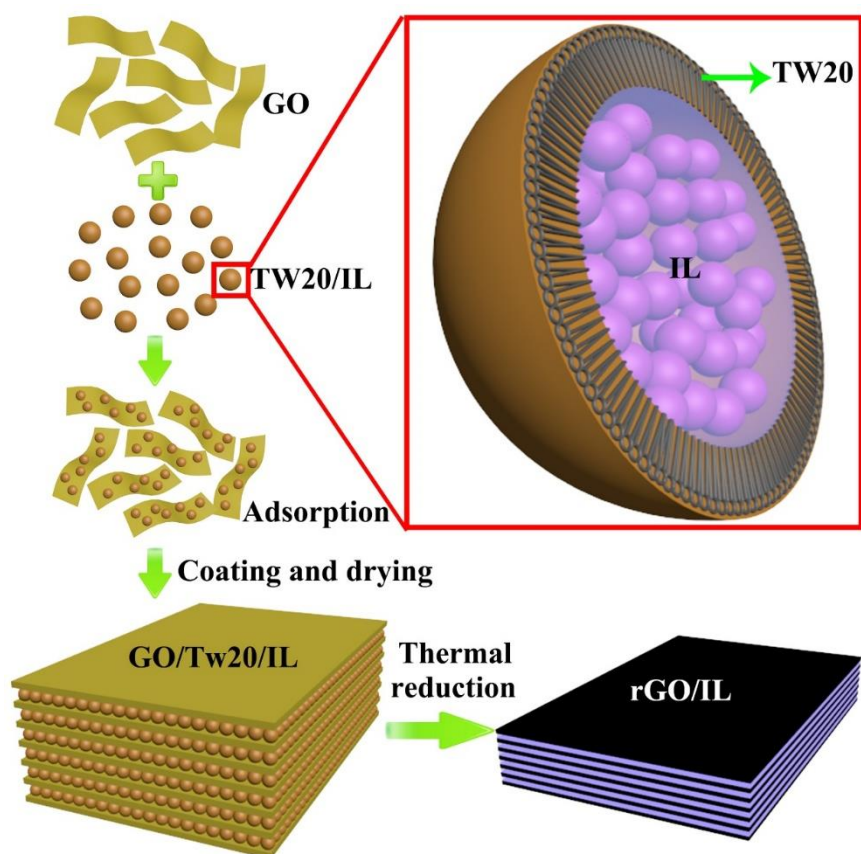

**Figure S1** Schematic illustration of the preparation of rGO/IL/CP film.

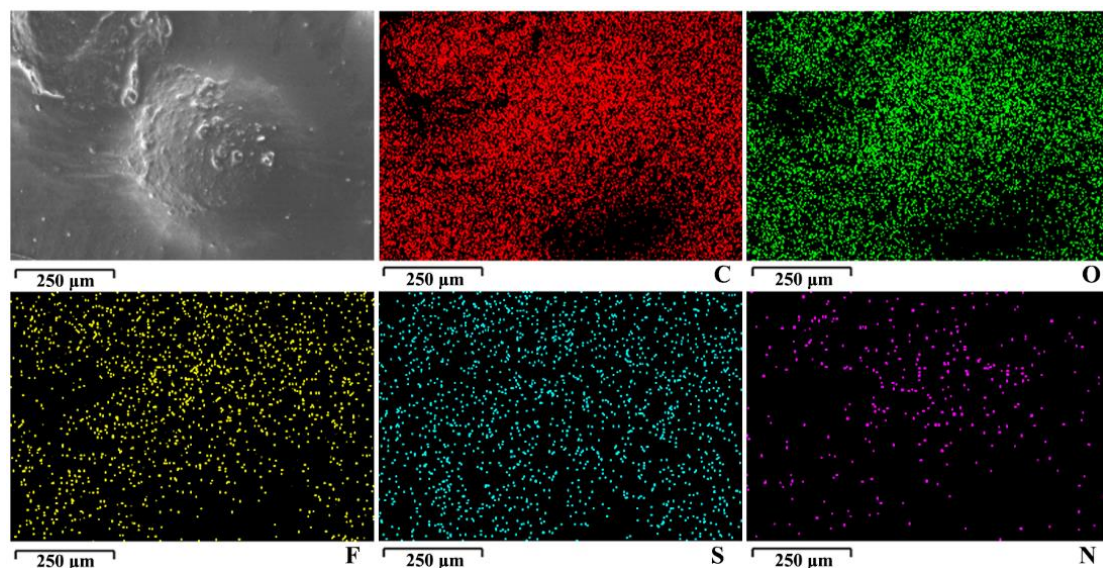

**Figure S2** The sectional SEM image and the corresponding C, F, S, O and N elemental mappings for GO/TW20/IL/CP before calcination.

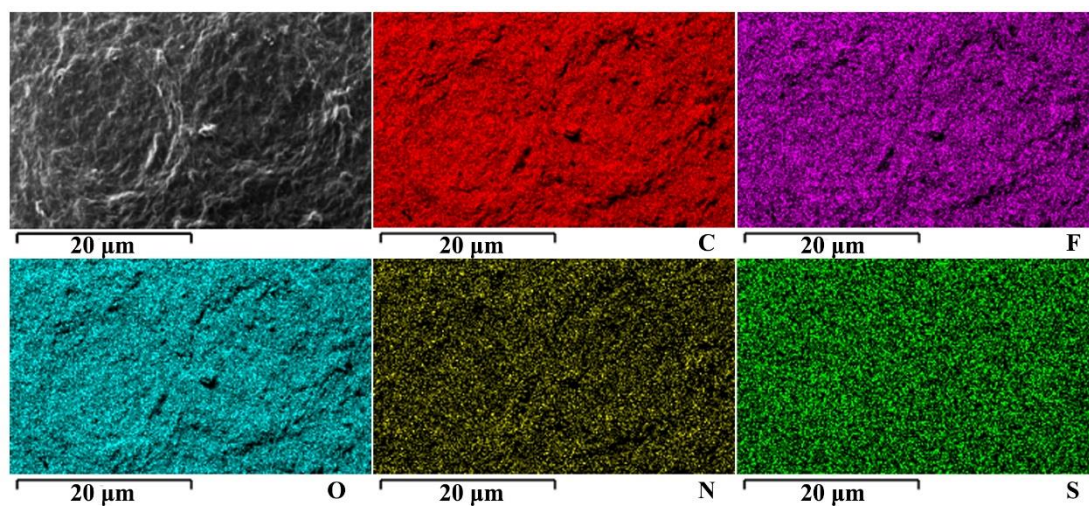

**Figure S3** SEM image and the corresponding C, F, O, N and S elemental mappings for rGO/IL/CP after calcination.

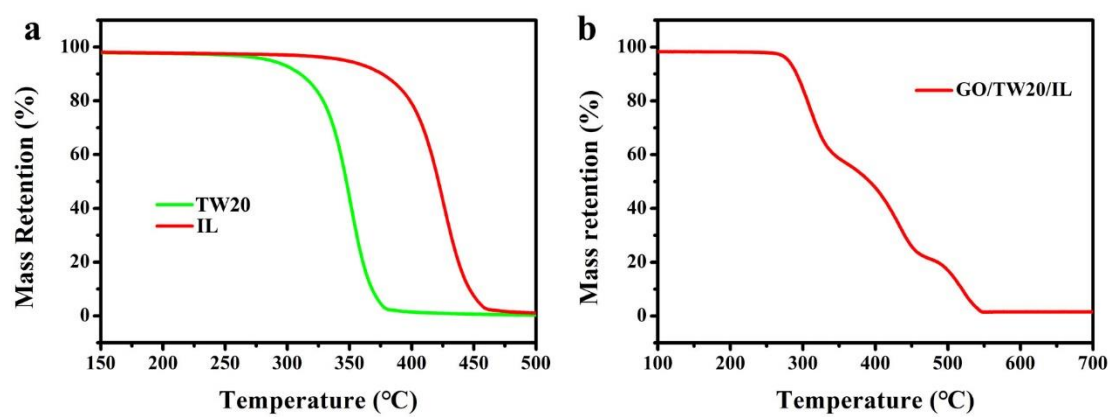

**Figure S4** TGA plots of a) IL and TW 20, b) the GO/TW20/IL film in the air.



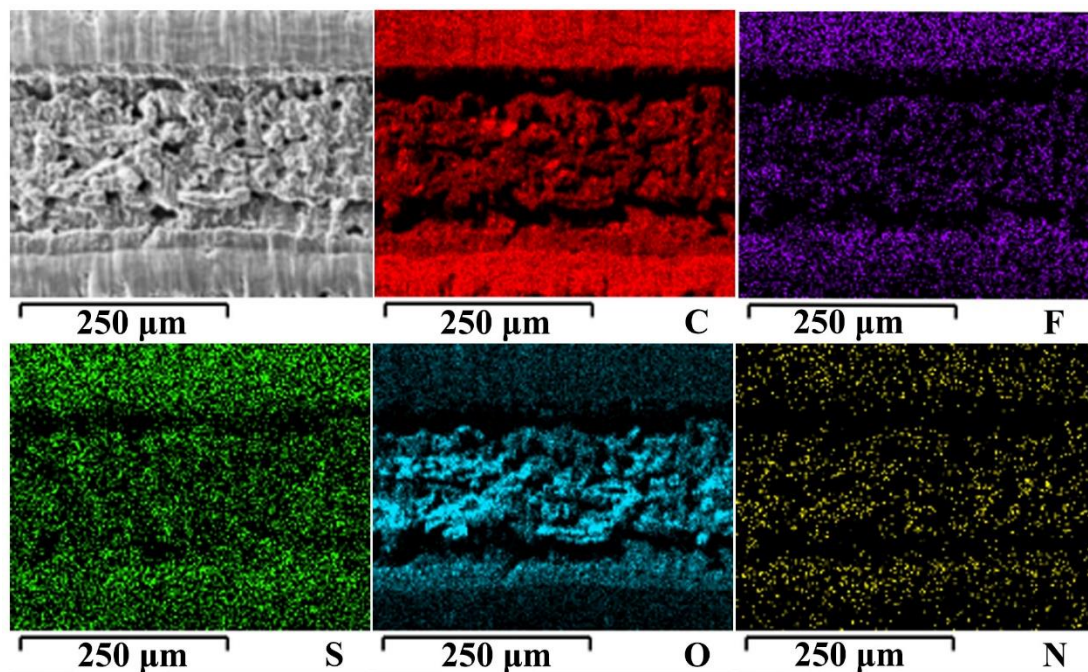

**Figure S5** The sectional SEM image and the corresponding C, F, S, O and N elemental mappings for macro-supercapacitor after LDW process.

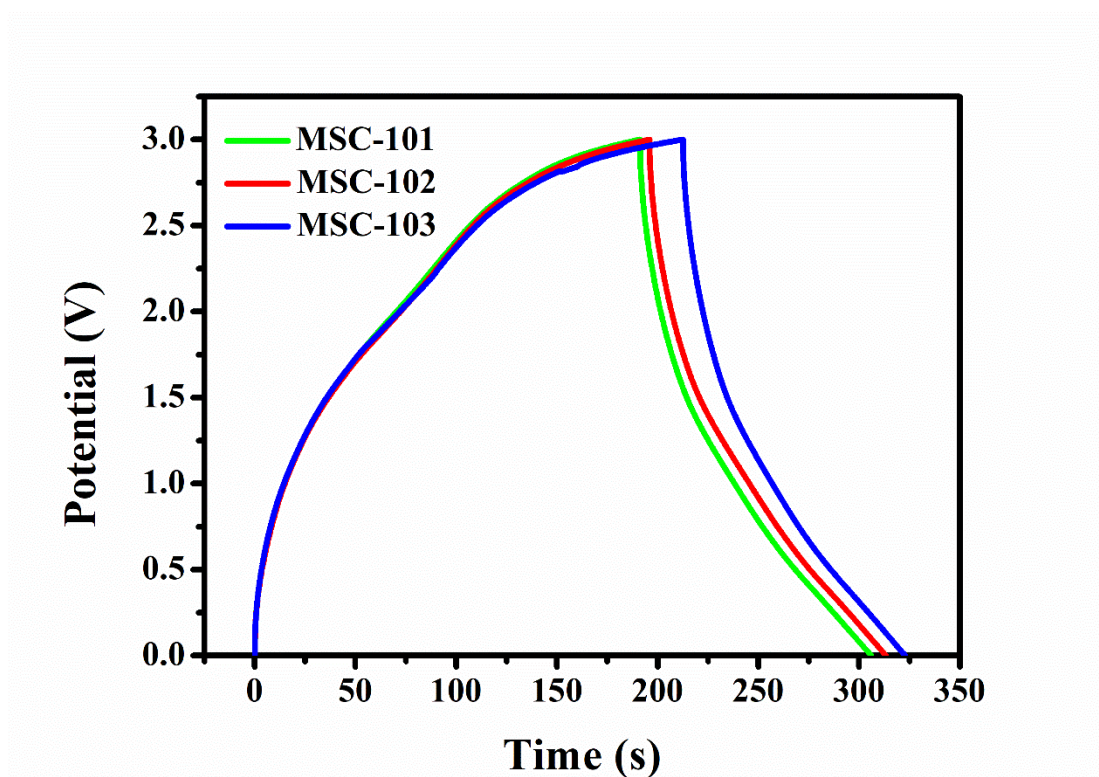

**Figure S6** The GCD curves of the MSC with various filter paper types (MSC-101, MSC-102, MSC-103).

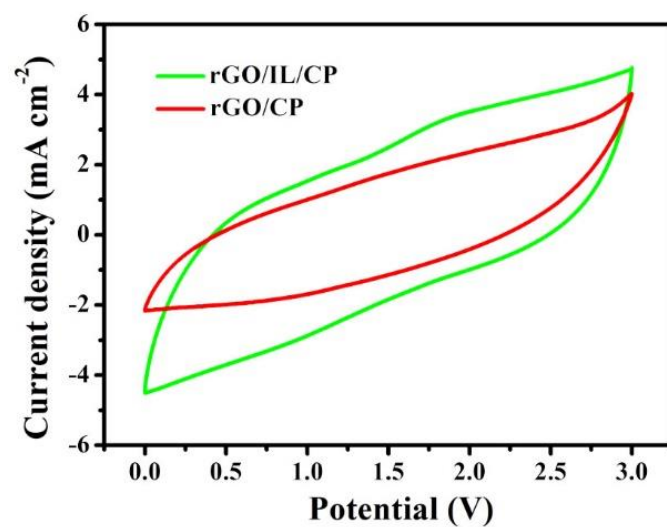

**Figure S7** The CV curves of the MSCs based on the rGO/IL/CP and rGO/CP film.

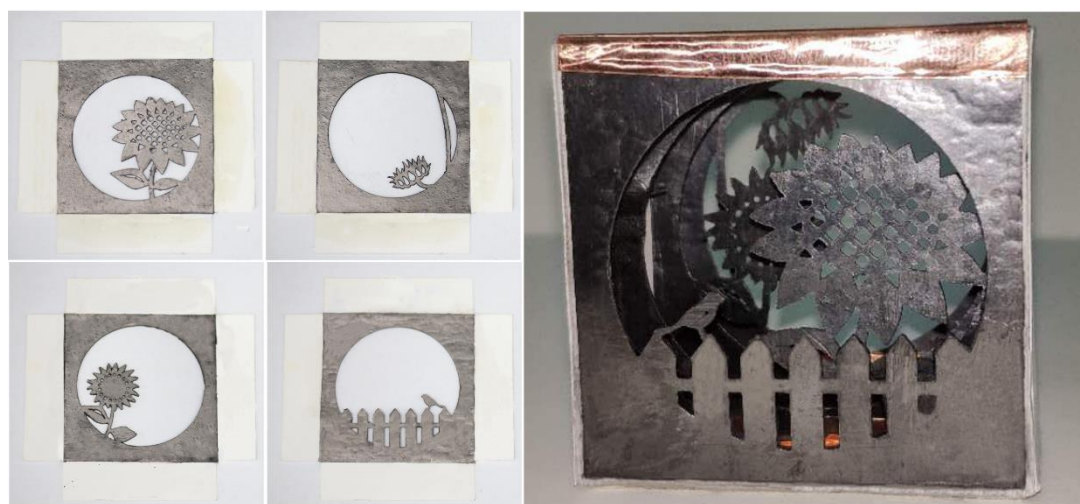

**Figure S8** The photographs of the 3D paper carving box and its components.

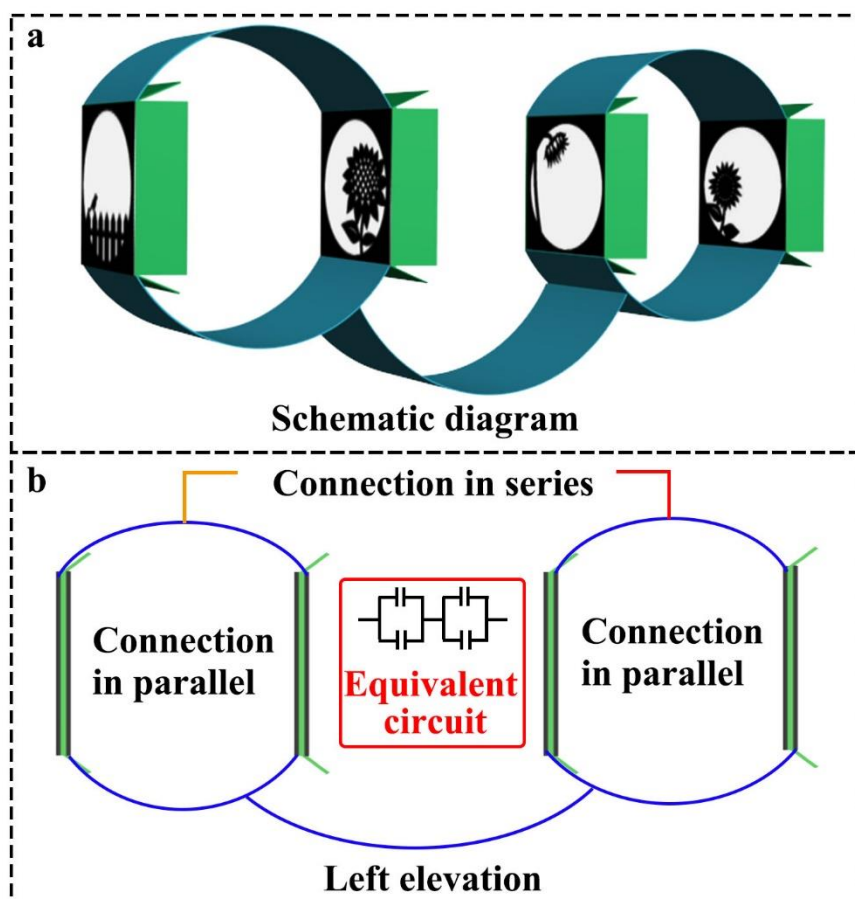

**Figure S9** The circuit diagram of the paper carving box.
